# Supplementary material for: BRCA2 carriers with male breast cancer show elevated tumour methylation
Source: BMC Cancer. 2017 Sep 11;17:641. doi: 10.1186/s12885-017-3632-7 (PMC5594583; doi:10.1186/s12885-017-3632-7)
Supplement: Supplementary file 2 — Methylation specific high resolution melting condition and primers (XLSX 36 kb) [file 12885_2017_3632_MOESM2_ESM.xlsx]

## Sheet: ST2 Primers  and conditions
GENE	FORWARD	REVERSE	REACTION MIXTURE				ACTIVATION	AMPLIFICATION					INACTIVATION	MELT
APC	CGGGGTTTTGTGTTTTATTG	TCCAACGAATTACACAACTAC	MgCl2 concentration (mmol/L)	Forward primer concentration (nmol/L)	Reverse primer concentration (mmol/L)	DNA amount per reaction (ng)	95C hold time (min)	Number of cycles	95C cycling time (sec)	Annealing temperature (celsius)	Annealing temp cycling time (sec)	72C cycling time (time)	97C hold time (min)	Temp range (celsius), 0.2C/step
CDH1	GAGTTTGCGGAAGTTAGTTTAGATTTTAG	CGACTCCAAAAACCCATAACTAACC	2.5	200	300	20	15	50	10	58.8	15	20	1	70-95
FOXC1	CGGGATAATAAGTAGGGTTGGTAGAATAG	GTCCAATAACTACCCTTACCCNACTTC	2.5	200	200	10	15	55	10	61	10	20	1	69-90
GSTP1	GGGGCGGGATTATTTTTATAAGGTT	CGTACTCACTAATAACANAAACTAC	2.5	200	200	20	15	55	10	58	10	30	1	63-87
MAL	GCGGAGTTAGCGAGAGGTTTG	AACCACTAAACAAAATACTACCCCCC	2.5	200	200	10	15	50	10	64.5	10	20	1	70-93
RARB	CGAGTTGTTTGAGGATTGGGATGT	ACGATACCCAAACAAACCCTACTC	2.5	200	200	10	15	45	10	60	10	20	1	72-95
RASSF1A	TCGGGTTTTATAGTTTTTGTATTTAGGTTTT	CCTCCCCCAAAATCCAAACTAA	3	200	300	20	15	50	10	67	10	20	1	70-92
RUNX3	GTTTCGGGTTTCGTATTTATTTTGAAGG	GACAACCCCAACTTCCTCTACTC	3	300	200	10	15	45	15	65	25	20	1	65-88
TWIST1	AGTTTTTTTCGATCGTTTTTTGGGTTG	CGAAACGATTTCCTTCCCC	3	200	200	10	15	50	10	58	20	25	1	70-90
WIF1	TTAAGTGGCGGTCGTTTAGGTTT	ACGAAAACAAAAAAACGAAAAAAACTAA	2.5	200	300	10	15	50	10	52	10	20	1	70-92
			3	400	400	10	15	50	10	54	20	25	1	70-90
